# Supplementary material for: Transcriptomic Characterization of a Synergistic Genetic Interaction during Carpel Margin Meristem Development in Arabidopsis thaliana
Source: PLoS One. 2011 Oct 21;6(10):e26231. doi: 10.1371/journal.pone.0026231 (PMC3198736; doi:10.1371/journal.pone.0026231)
Supplement: Table S10 — Genes over-expressed in the seu ant double mutant via one way ANOVA. (XLS) [file pone.0026231.s010.xls]

## Sheet: vpexport.2011-02-11_#6024FE.xls
SUPPLEMENTAL TABLE 10 - Wynn et al 2011
Genes over-expressed in the seu ant double mutant via one way ANOVA - >Strategy 1B-all16upindbl1pt0
At1g55260	protease inhibitor/seed storage/lipid transfer protein (LTP) family protein
At4g16447	unknown protein
At4g37800	xyloglucan:xyloglucosyl transferase, putative / xyloglucan endotransglycosylase, putative / endo-xyloglucan transferase, putative
At1g24070	ATCSLA10,ATCSLA10 (Cellulose synthase-like A10); transferase, transferring glycosyl groups
At4g37300	MEE59,MEE59 (maternal effect embryo arrest 59)
At4g22200	AKT2,AKT2 (Arabidopsis K+ transporter 2); cyclic nucleotide binding / inward rectifier potassium channel
At1g17745	PGDH,PGDH (3-PHOSPHOGLYCERATE DEHYDROGENASE); phosphoglycerate dehydrogenase
At3g17820	ATGSKB6,ATGSKB6 (Arabidopsis thaliana glutamine synthase clone KB6); glutamate-ammonia ligase
At3g61820	aspartyl protease family protein
At2g16990	tetracycline transporter,unknown protein
At5g07990	TT7,TT7 (TRANSPARENT TESTA 7); flavonoid 3'-monooxygenase/ oxygen binding
At2g35290	unknown protein
At1g24020	MLP423,Bet v I allergen family protein
At1g76520	auxin efflux carrier family protein
At4g15200	formin homology 2 domain-containing protein / FH2 domain-containing protein
At5g67160	transferase family protein
At3g54820	PIP2D,PIP2;5,PIP2;5/PIP2D (plasma membrane intrinsic protein 2;5); water channel
At4g16190	cysteine proteinase, putative
At5g47910	RBOHD,RBOHD (RESPIRATORY BURST OXIDASE PROTEIN D)
At2g24180	CYP71B6,CYP71B6 (CYTOCHROME P450 71B6); oxygen binding
At3g15650	phospholipase/carboxylesterase family protein
At1g62710	BETA-VPE,BETA-VPE (vacuolar processing enzyme beta); cysteine-type endopeptidase
At1g05850	POM1,POM1 (POM-POM1); chitinase
At3g26590	MATE efflux family protein
At2g35820	unknown protein
At1g35290	thioesterase family protein
At4g30650	hydrophobic protein, putative / low temperature and salt responsive protein, putative
At1g56580	unknown protein
At1g56700	pyrrolidone-carboxylate peptidase family protein
At3g62700	ATMRP10,ATMRP10 (Arabidopsis thaliana multidrug resistance-associated protein 10)
At5g45280	pectinacetylesterase, putative
At5g48880	PKT2,PKT1,KAT5,KAT5/PKT1/PKT2 (PEROXISOMAL 3-KETO-ACYL-COA THIOLASE 1, PEROXISOMAL 3-KETO-ACYL-COA THIOLASE 2); acetyl-CoA C-acyltransferase
At1g78570	ROL1,RHM1,RHM1/ROL1 (RHAMNOSE BIOSYNTHESIS1); UDP-glucose 4,6-dehydratase/ catalytic
At2g44670	senescence-associated protein-related
At3g18080	glycosyl hydrolase family 1 protein
At3g11090	LBD21,LOB domain family protein / lateral organ boundaries domain family protein (LBD21)
At2g36910	ATPGP1,ATPGP1 (ARABIDOPSIS THALIANA P GLYCOPROTEIN1); calmodulin binding
At1g69780	ATHB13,ATHB13 (ARABIDOPSIS THALIANA HOMEOBOX PROTEIN 12); DNA binding / transcription factor
At2g42800	leucine-rich repeat family protein
At1g12845	unknown protein
At5g36160	aminotransferase-related
At5g65380	ripening-responsive protein, putative
At1g44170	ALDH3H1,ALDH3H1 (ALDEHYDE DEHYDROGENASE 4),ALDH3H1 (ALDEHYDE DEHYDROGENASE 4); 3-chloroallyl aldehyde dehydrogenase,ALDH3H1 (ALDEHYDE DEHYDROGENASE 4); 3-chloroallyl aldehyde dehydrogenase/ aldehyde dehydrogenase (NAD)
At3g52500	aspartyl protease family protein
At5g51720	unknown protein
At4g15210	ATBETA-AMY,ATBETA-AMY (BETA-AMYLASE); beta-amylase
At1g31580	ECS1
At1g80050	APT2,APT2 (ADENINE PHOSPHORIBOSYL TRANSFERASE 2); adenine phosphoribosyltransferase
At3g06035	unknown protein
At4g17460	HAT1,HAT1 (homeobox-leucine zipper protein 1); DNA binding / transcription factor
At1g43910	AAA-type ATPase family protein
At2g17280	phosphoglycerate/bisphosphoglycerate mutase family protein
At5g22460	esterase/lipase/thioesterase family protein
At1g65960	GAD2,GAD2 (GLUTAMATE DECARBOXYLASE 2); calmodulin binding,unknown protein
At1g26960	ATHB23,ATHB23 (ARABIDOPSIS THALIANA HOMEOBOX PROTEIN 23); DNA binding / transcription factor
At1g17380	TIFY11A,JAZ5,unknown protein
At2g22970	SCPL11,SCPL11; serine carboxypeptidase
At3g16240	DELTA-TIP,DELTA-TIP (delta tonoplast integral protein); water channel
At5g46110	APE2,APE2 (ACCLIMATION OF PHOTOSYNTHESIS TO ENVIRONMENT),APE2 (ACCLIMATION OF PHOTOSYNTHESIS TO ENVIRONMENT); antiporter/ triose-phosphate transporter,APE2 (ACCLIMATION OF PHOTOSYNTHESIS TO ENVIRONMENT); triose-phosphate transporter
At1g76160	SKS5,SKS5 (SKU5 Similar 5); copper ion binding / oxidoreductase
At5g55250	IAMT1,IAMT1 (IAA CARBOXYLMETHYLTRANSFERASE 1),IAMT1 (IAA CARBOXYLMETHYLTRANSFERASE 1); S-adenosylmethionine-dependent methyltransferase
At2g28900	OEP16,OEP16 (OUTER ENVELOPE PROTEIN 16); protein translocase
At5g55450	protease inhibitor/seed storage/lipid transfer protein (LTP) family protein
At1g11840	ATGLX1,ATGLX1 (GLYOXALASE I HOMOLOG); lactoylglutathione lyase
At3g15020	malate dehydrogenase (NAD), mitochondrial, putative
At1g01140	CIPK9,CIPK9 (CBL-INTERACTING PROTEIN KINASE 9); kinase
At3g26290	CYP71B26,CYP71B26 (cytochrome P450, family 71, subfamily B, polypeptide 26); oxygen binding
At1g65900	unknown protein
At1g76180	ERD14,ERD14 (EARLY RESPONSE TO DEHYDRATION 14)
At3g46530	RPP13,RPP13 (RECOGNITION OF PERONOSPORA PARASITICA 13); ATP binding
At2g25510	unknown protein
At1g48750	protease inhibitor/seed storage/lipid transfer protein (LTP) family protein
At2g46140	late embryogenesis abundant protein, putative / LEA protein, putative
At3g46540	epsin N-terminal homology (ENTH) domain-containing protein / clathrin assembly protein-related
At3g13640	ATRLI1,ATRLI1 (Arabidopsis thaliana RNase L inhibitor protein 1)
At1g13930	unknown protein
At1g78490	CYP708A3,CYP708A3 (cytochrome P450, family 708, subfamily A, polypeptide 3); oxygen binding
At3g15810	unknown protein
At5g54160	ATOMT1,ATOMT1 (O-METHYLTRANSFERASE 1)
At5g59305	unknown protein
At3g24450	copper-binding family protein
At5g64850	unknown protein
At2g38310	unknown protein
At2g39010	PIP2E,PIP2;6,PIP2;6/PIP2E (plasma membrane intrinsic protein 2;6); water channel
At4g15920	nodulin MtN3 family protein
At1g09310	unknown protein
At1g20450	LTI45,ERD10,ERD10/LTI45 (EARLY RESPONSIVE TO DEHYDRATION 10)
At1g07440	oxidoreductase,tropinone reductase, putative / tropine dehydrogenase, putative
At2g36870	xyloglucan:xyloglucosyl transferase, putative / xyloglucan endotransglycosylase, putative / endo-xyloglucan transferase, putative
At1g78020	senescence-associated protein-related
At5g12270	oxidoreductase, 2OG-Fe(II) oxygenase family protein
At4g29720	ATPAO5,ATPAO5 (POLYAMINE OXIDASE 5); amine oxidase
At4g30190	AHA2,AHA2 (Arabidopsis H(+)-ATPase 2); ATPase
At2g15970	COR413-PM1,COR413-PM1 (cold regulated 413 plasma membrane 1)
At2g33380	RD20,RD20 (RESPONSIVE TO DESSICATION 20); calcium ion binding
At3g46970	PHS2,ATPHS2,ATPHS2/PHS2 (ALPHA-GLUCAN PHOSPHORYLASE 2); phosphorylase/ transferase, transferring glycosyl groups
At5g53880	unknown protein
At1g45145	ATTRX5,ATTRX5 (thioredoxin H-type 5); thiol-disulfide exchange intermediate
At4g21650	subtilase family protein
At1g31550	GDSL-motif lipase, putative,carboxylic ester hydrolase/ lipase
At5g39730	avirulence-responsive protein-related / avirulence induced gene (AIG) protein-related
At3g62270	anion exchange family protein
At3g13662	disease resistance-responsive protein-related / dirigent protein-related
At1g27030	unknown protein
At5g44630	terpene synthase/cyclase family protein
At4g23870	unknown protein
At1g07090	unknown protein
At2g43550	trypsin inhibitor, putative
At3g57520	ATSIP2,ATSIP2 (ARABIDOPSIS THALIANA SEED IMBIBITION 2); hydrolase, hydrolyzing O-glycosyl compounds
At4g23990	ATCSLG3,ATCSLG3 (Cellulose synthase-like G3); transferase/ transferase, transferring glycosyl groups
At5g01600	ATFER1,ATFER1 (ferretin 1); ferric iron binding
At5g67110	ALC,ALC (ALCATRAZ),ALC (ALCATRAZ); DNA binding / transcription factor
At1g29395	COR414-TM1,COR414-TM1 (cold regulated 414 thylakoid membrane 1)
At1g49750	leucine-rich repeat family protein
At1g35720	ANNAT1,ANNAT1 (ANNEXIN ARABIDOPSIS 1); calcium ion binding / calcium-dependent phospholipid binding
At3g03270	universal stress protein (USP) family protein / early nodulin ENOD18 family protein
At5g65730	xyloglucan:xyloglucosyl transferase, putative / xyloglucan endotransglycosylase, putative / endo-xyloglucan transferase, putative
At1g69870	proton-dependent oligopeptide transport (POT) family protein
At2g06925	PLA2-ALPHA,ATSPLA2-ALPHA,ATSPLA2-ALPHA/PLA2-ALPHA (PHOSPHOLIPASE A2-ALPHA); phospholipase A2
At1g02205	CER1,CER1 (ECERIFERUM 1)
At2g43535	trypsin inhibitor, putative
At3g47295	unknown protein
At1g21250	WAK1,WAK1 (CELL WALL-ASSOCIATED KINASE); kinase
At5g24570	unknown protein
At2g34490	CYP710A2,CYP710A2 (cytochrome P450, family 710, subfamily A, polypeptide 2); C-22 sterol desaturase/ oxygen binding
At2g43530	trypsin inhibitor, putative
At5g37600	ATGSR1,ATGSR1 (Arabidopsis thaliana glutamine synthase clone R1); glutamate-ammonia ligase
At2g40100	LHCB4.3,LHCB4.3 (LIGHT HARVESTING COMPLEX PSII); chlorophyll binding
